# Supplementary material
Source: publisher site journal article supplement (https://www.dovepress.com/article/275831)
Supplement: Supplementary file 1 [file get_supplementary_file.php]

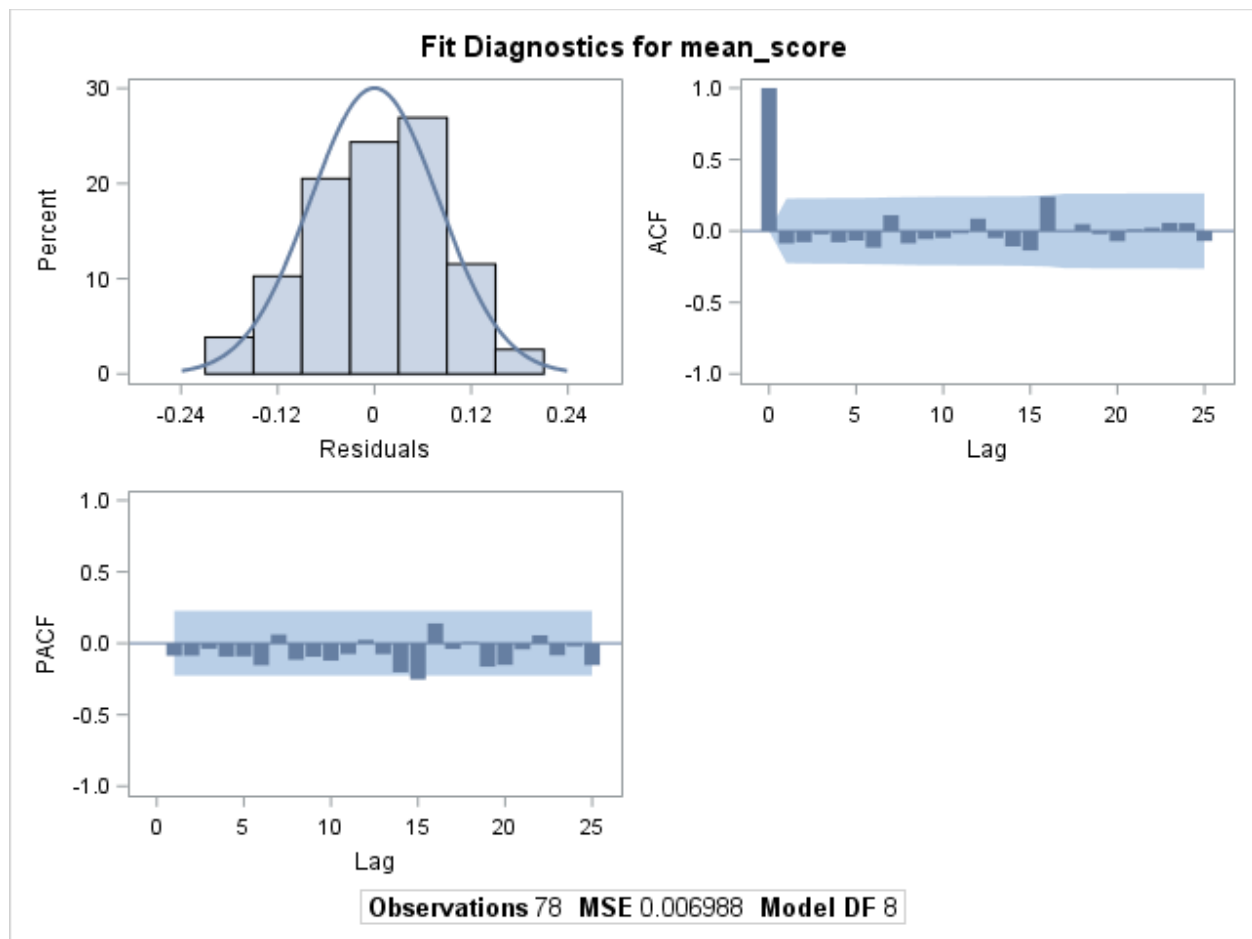

Appendix Figure A1. Dignostic plot of the residuals from a segmented regression with comparative design analysis for assessing the impact of an ACR Select tool in increasing appropriateness score of high-cost imaging orders

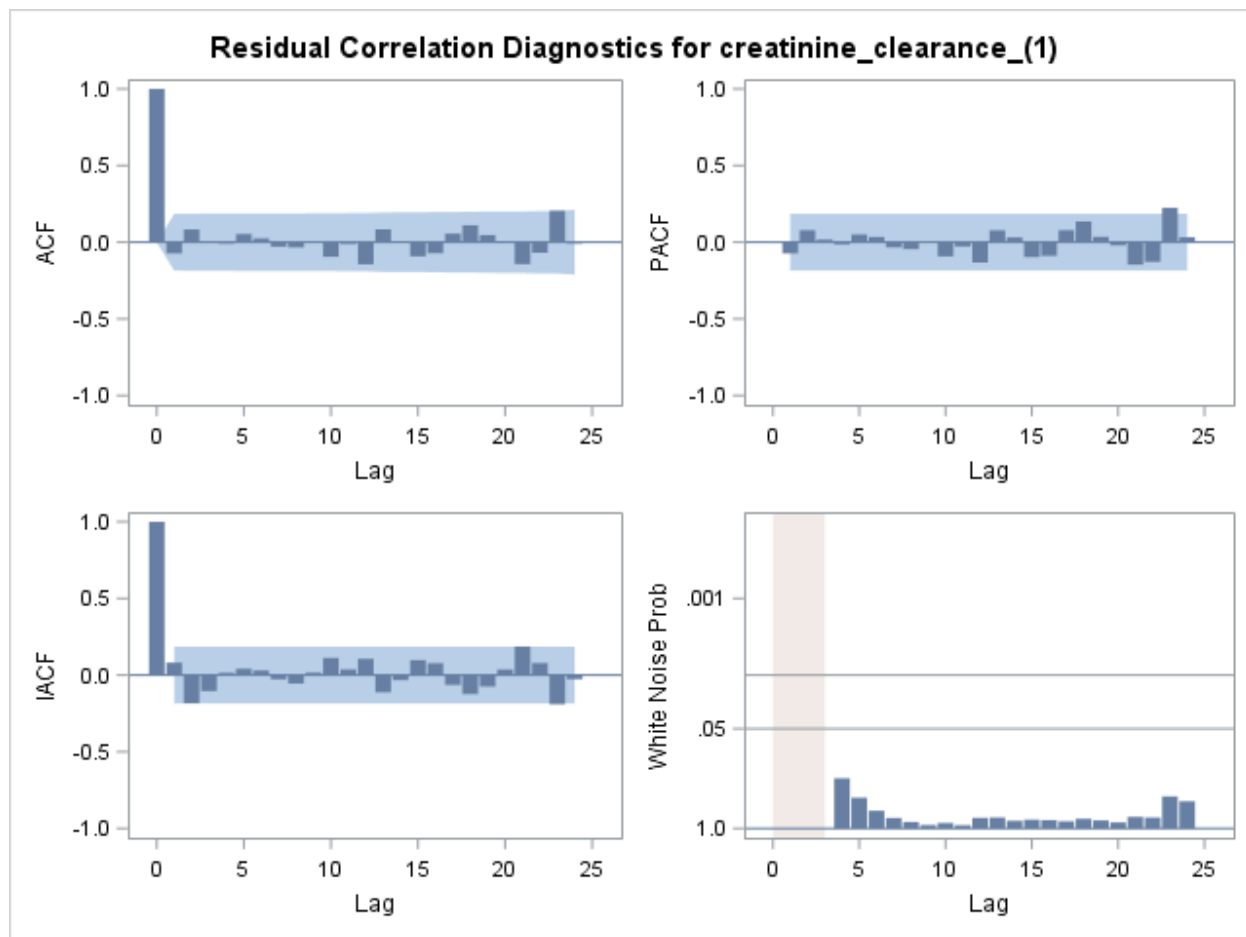

Appendix Figure A2. Diagnostic plot of the residuals from the interventional ARIMA  $(1, 1, 1)(1, 0, 0)_{12}$  model in examining the effects of eGFR reporting with prompts on physician requests for creatinine clearance collection in Ontario, Canada
